# Supplementary material
Source: Springer Nature journal article supplement (https://www.springermedizin.de/resource/supplementary/12955_2009_632_MOESM1_ESM.pdf/9561160)
Supplement: MOESM1 [file 9561160]

Computerised search of databases and reference checking.  
*567 hits*

548 articles excluded due to selection  
criteria and removal of duplicate articles\*

*21 articles* potential applicable. Hard copies were  
obtained for more detailed evaluation of our selection  
criteria.

After applying our selection criteria to the hard copies, 19  
articles were selected and were finally included in this  
review.
